# Supplementary material for: Genomic Epidemiology of Carbapenem- and Colistin-Resistant Klebsiella pneumoniae Isolates From Serbia: Predominance of ST101 Strains Carrying a Novel OXA-48 Plasmid
Source: Front Microbiol. 2020 Feb 21;11:294. doi: 10.3389/fmicb.2020.00294 (PMC7047997; doi:10.3389/fmicb.2020.00294)
Supplement: Supplementary file 1 [file Data_Sheet_1.xlsx]

## Sheet: S1
Table S1. Sample information of the 45 colR Serbian K. pneumoniae isolates. Genotypic results, Etest MICs (Ertapenem, Imipenem and Meropenem) , broth microdilution MICs (colistin) and Vitek2 results (all other antibiotics) are also reported. (CN, Clinical center of Niš, Niš; CV, Clinical center of Vojvodina, Novi Sad; KB, Konzilijum, Belgrade; DM, University hospital center “Dr Dragiša Mišovic-De…
Strain ID	NCBI ID	Year	Medical setting	Sample origin	ST	carbapenemase	cps	wzi	MgrB alterations	Other alterations concerning colistin resistance	Colistin (BMD)	Ertapenem (Etest)	Imipenem (Etest)	Meropenem (Etest)	Ampicillin	Ampicillin/Sulbactam	Piperacillin	Piperacillin/Tazobactam	Ticarcillin	Ticarcillin/Clavulanic Acid	Amoxicillin/Clavulanic Acid	Cefuroxime	Cefoxitin	Cefixime	Ceftazidime	Ceftriaxone	Cefepime	Aztreonam	Amikacin	Gentamicin	Tobramycin	Ciprofloxacin	Levofloxacin	Moxifloxacin	Ofloxacin	Tigecycline	Chloramphenicol	Trimethoprim	Trimethoprim/Sulfamethoxazole
CCN-2013-099	1707099	2013	CCN-N (H)	UR	ST340	NDM-1	K15	50	C28Y		32 (R)	>32 (R)	>32 (R)	>32 (R)	>=32 (R)	>=32 (R)	>=128 (R)	>=128 (R)	>=128 (R)	>=128 (R)	>=32 (R)	>=64 (R)	>=64 (R)	>=4 (R)	>=64 (R)	>=64 (R)	>=64 (R)	>=64 (R)	16 (I)	>=16 (R)	>=16 (R)	>=4 (R)	>=8 (R)	>=8 (R)	>=8 (R)	<=0.5 (S)	16 (R)	>=16 (R)	>=320 (R)
CCN-2014-100	1707100	2014	CCN-N (H)	UR	ST437	NDM-1	K36	109	Δa4, (frameshift and premature termination)	-	32 (R)	>32 (R)	>32 (R)	>32 (R)	>=32 (R)	>=32 (R)	>=128 (R)	>=128 (R)	>=128 (R)	>=128 (R)	>=32 (R)	>=64 (R)	>=64 (R)	>=4 (R)	>=64 (R)	>=64 (R)	>=64 (R)	>=64 (R)	>=64 (R)	>=16 (R)	>=16 (R)	>=4 (R)	>=8 (R)	>=8 (R)	>=8 (R)	2 (R)	16 (R)	>=16 (R)	>=320 (R)
CCN-2014-101	1707101	2014	CCN-N (H)	BS	ST437	-	K36	109	Δa4, (frameshift and premature termination)	-	16 (R)	1 (R)	0.25 (S)	0.38 (S)	>=32 (R)	>=32 (R)	>=128 (R)	32 (R)	>=128 (R)	>=128 (R)	>=32 (R)	>=64 (R)	32 (R)	>=4 (R)	>=64 (R)	>=64 (R)	>=64 (R)	>=64 (R)	8 (S)	<=1 (S)	>=16 (R)	>=4 (R)	>=8 (R)	>=8 (R)	>=8 (R)	<=0.5 (S)	4 (S)	1 (S)	<=20 (S)
CCN-2014-102	1707102	2014	CCN-N (H)	UR	ST437	-	K36	109	Δa4, (frameshift and premature termination)	-	16 (R)	1 (R)	0.19 (S)	0.38 (S)	>=32 (R)	>=32 (R)	>=128 (R)	>=128 (R)	>=128 (R)	>=128 (R)	16 (R)	>=64 (R)	>=64 (R)	>=4 (R)	16 (R)	>=64 (R)	>=64 (R)	>=64 (R)	4 (S)	<=1 (S)	>=16 (R)	>=4 (R)	>=8 (R)	>=8 (R)	>=8 (R)	>=8 (R)	32 (R)	4 (I)	40 (S)
CCV-2015-103	1707103	2015	CCV-NS (H)	SS	ST101	OXA-48	K17	137	C28S	-	16 (R)	>32 (R)	4 (I)	8 (I)	>=32 (R)	>=32 (R)	>=128 (R)	>=128 (R)	>=128 (R)	>=128 (R)	>=32 (R)	>=64 (R)	>=64 (R)	>=4 (R)	>=64 (R)	>=64 (R)	>=64 (R)	>=64 (R)	16 (I)	>=16 (R)	>=16 (R)	>=4 (R)	>=8 (R)	>=8 (R)	>=8 (R)	4 (R)	16 (R)	>=16 (R)	40 (S)
CCV-2015-104	1707104	2015	CCV-NS (H)	WS	ST101	OXA-48	K17	137	C28S	-	8 (R)	>32 (R)	4 (I)	6 (I)	>=32 (R)	>=32 (R)	>=128 (R)	>=128 (R)	>=128 (R)	>=128 (R)	>=32 (R)	>=64 (R)	>=64 (R)	>=4 (R)	>=64 (R)	>=64 (R)	>=64 (R)	>=64 (R)	16 (I)	>=16 (R)	>=16 (R)	>=4 (R)	>=8 (R)	>=8 (R)	>=8 (R)	2 (R)	16 (R)	>=16 (R)	<=20 (S)
CCV-2015-105	1707105	2015	CCV-NS (H)	WS	ST101	OXA-48	K17	137	C28S	PmrB (T157P)	32 (R)	16 (R)	2 (S)	4 (I)	>=32 (R)	>=32 (R)	>=128 (R)	>=128 (R)	>=128 (R)	>=128 (R)	>=32 (R)	>=64 (R)	>=64 (R)	>=4 (R)	>=64 (R)	>=64 (R)	>=64 (R)	>=64 (R)	8 (S)	>=16 (R)	>=16 (R)	>=4 (R)	>=8 (R)	>=8 (R)	>=8 (R)	2 (R)	8 (S)	>=16 (R)	<=20 (S)
CCV-2015-106	1707106	2015	CCV-NS (H)	SS	ST101	OXA-48	K17	137	C28S	-	8 (R)	>32 (R)	4 (I)	8 (I)	>=32 (R)	>=32 (R)	>=128 (R)	>=128 (R)	>=128 (R)	>=128 (R)	>=32 (R)	>=64 (R)	>=64 (R)	>=4 (R)	>=64 (R)	>=64 (R)	>=64 (R)	>=64 (R)	16 (I)	>=16 (R)	>=16 (R)	>=4 (R)	>=8 (R)	>=8 (R)	>=8 (R)	2 (R)	16 (R)	>=16 (R)	<=20 (S)
CCV-2016-107	1707107	2016	CCV-NS (H)	SS	ST101	OXA-48	K17	137	C28S	-	8 (R)	>32 (R)	2 (S)	6 (I)	>=32 (R)	>=32 (R)	>=128 (R)	>=128 (R)	>=128 (R)	>=128 (R)	>=32 (R)	>=64 (R)	>=64 (R)	>=4 (R)	>=64 (R)	>=64 (R)	>=64 (R)	>=64 (R)	8 (S)	>=16 (R)	>=16 (R)	>=4 (R)	>=8 (R)	>=8 (R)	>=8 (R)	2 (R)	16 (R)	>=16 (R)	40 (S)
CCV-2016-108	1707108	2016	CCV-NS (H)	WS	ST101	OXA-48	K17	137	C28S	-	8 (R)	>32 (R)	4 (I)	8 (I)	>=32 (R)	>=32 (R)	>=128 (R)	>=128 (R)	>=128 (R)	>=128 (R)	>=32 (R)	>=64 (R)	>=64 (R)	>=4 (R)	>=64 (R)	>=64 (R)	>=64 (R)	>=64 (R)	8 (S)	>=16 (R)	>=16 (R)	>=4 (R)	>=8 (R)	>=8 (R)	>=8 (R)	2 (R)	16 (R)	>=16 (R)	40 (S)
CCV-2016-109	1707109	2016	CCV-NS (H)	WS	ST101	OXA-48	K17	137	C28S	-	16 (R)	>32 (R)	2 (S)	6 (I)	>=32 (R)	>=32 (R)	>=128 (R)	>=128 (R)	>=128 (R)	>=128 (R)	>=32 (R)	>=64 (R)	>=64 (R)	>=4 (R)	>=64 (R)	>=64 (R)	>=64 (R)	>=64 (R)	16 (I)	>=16 (R)	>=16 (R)	>=4 (R)	>=8 (R)	>=8 (R)	>=8 (R)	2 (R)	16 (R)	>=16 (R)	40 (S)
CCV-2015-110	1707110	2015	CCV-NS (H)	WS	ST101	OXA-48	K17	137	C28S	-	16 (R)	>32 (R)	2 (S)	8 (I)	>=32 (R)	>=32 (R)	>=128 (R)	>=128 (R)	>=128 (R)	>=128 (R)	>=32 (R)	>=64 (R)	>=64 (R)	>=4 (R)	>=64 (R)	>=64 (R)	>=64 (R)	>=64 (R)	16 (I)	>=16 (R)	>=16 (R)	>=4 (R)	>=8 (R)	>=8 (R)	>=8 (R)	2 (R)	16 (R)	>=16 (R)	<=20 (S)
CCV-2015-111	1707111	2015	CCV-NS (H)	BA	ST101	OXA-48	K17	137	C28S	-	16 (R)	>32 (R)	2 (S)	6 (I)	>=32 (R)	>=32 (R)	>=128 (R)	>=128 (R)	>=128 (R)	>=128 (R)	>=32 (R)	>=64 (R)	>=64 (R)	>=4 (R)	>=64 (R)	>=64 (R)	>=64 (R)	>=64 (R)	8 (S)	>=16 (R)	>=16 (R)	>=4 (R)	>=8 (R)	>=8 (R)	>=8 (R)	2 (R)	16 (R)	>=16 (R)	<=20 (S)
CCV-2015-112	1707112	2015	CCV-NS (H)	UR	ST101	OXA-48	K17	137	C28S	-	8 (R)	>32 (R)	4 (I)	6 (I)	>=32 (R)	>=32 (R)	>=128 (R)	>=128 (R)	>=128 (R)	>=128 (R)	>=32 (R)	>=64 (R)	>=64 (R)	>=4 (R)	>=64 (R)	>=64 (R)	>=64 (R)	>=64 (R)	16 (I)	>=16 (R)	>=16 (R)	>=4 (R)	>=8 (R)	>=8 (R)	>=8 (R)	2 (R)	16 (R)	>=16 (R)	40 (S)
CCV-2015-113	1707113	2015	CCV-NS (H)	SS	ST101	OXA-48	K17	137	C28S	-	16 (R)	>32 (R)	2 (S)	6 (I)	>=32 (R)	>=32 (R)	>=128 (R)	>=128 (R)	>=128 (R)	>=128 (R)	>=32 (R)	>=64 (R)	>=64 (R)	>=4 (R)	>=64 (R)	>=64 (R)	>=64 (R)	>=64 (R)	16 (I)	>=16 (R)	>=16 (R)	>=4 (R)	>=8 (R)	>=8 (R)	>=8 (R)	2 (R)	16 (R)	>=16 (R)	40 (S)
CCV-2015-114	1707114	2015	CCV-NS (H)	UR	ST101	OXA-48	K17	137	C28S	-	16 (R)	>32 (R)	3 (I)	8 (I)	>=32 (R)	>=32 (R)	>=128 (R)	>=128 (R)	>=128 (R)	>=128 (R)	>=32 (R)	>=64 (R)	>=64 (R)	>=4 (R)	>=64 (R)	>=64 (R)	>=64 (R)	>=64 (R)	16 (I)	<=1 (S)	>=16 (R)	>=4 (R)	>=8 (R)	>=8 (R)	>=8 (R)	2 (R)	16 (R)	>=16 (R)	40 (S)
KB-2015-116	1707116	2015	K-B (O)	UR	ST101	OXA-48	K17	137	C28S	-	16 (R)	>32 (R)	3 (I)	6 (I)	>=32 (R)	>=32 (R)	>=128 (R)	>=128 (R)	>=128 (R)	>=128 (R)	>=32 (R)	>=64 (R)	>=64 (R)	>=4 (R)	>=64 (R)	>=64 (R)	>=64 (R)	>=64 (R)	8 (S)	>=16 (R)	>=16 (R)	>=4 (R)	>=8 (R)	>=8 (R)	>=8 (R)	2 (R)	16 (R)	>=16 (R)	40 (S)
KB-2015-117	1707117	2015	K-B (O)	BS/CVC	ST101	OXA-48	K17	137	C28S	-	16 (R)	>32 (R)	3 (I)	8 (I)	>=32 (R)	>=32 (R)	>=128 (R)	>=128 (R)	>=128 (R)	>=128 (R)	>=32 (R)	>=64 (R)	>=64 (R)	>=4 (R)	>=64 (R)	>=64 (R)	>=64 (R)	>=64 (R)	16 (I)	>=16 (R)	>=16 (R)	>=4 (R)	>=8 (R)	>=8 (R)	>=8 (R)	2 (R)	<=2 (S)	>=16 (R)	40 (S)
KB-2015-118	1707118	2015	K-B (H)	BS	ST101	OXA-48	K17	137	C28S	-	16 (R)	24 (R)	3 (I)	6 (I)	>=32 (R)	>=32 (R)	>=128 (R)	>=128 (R)	>=128 (R)	>=128 (R)	>=32 (R)	>=64 (R)	>=64 (R)	>=4 (R)	>=64 (R)	>=64 (R)	>=64 (R)	>=64 (R)	16 (I)	>=16 (R)	>=16 (R)	>=4 (R)	>=8 (R)	>=8 (R)	>=8 (R)	2 (R)	16 (R)	>=16 (R)	40 (S)
KB-2015-119	1707119	2015	K-B (H)	UR	ST336	OXA-48	K25	141	Q30*	PmrA (E57G)	16 (R)	32 (R)	12 (R)	6 (I)	>=32 (R)	>=32 (R)	>=128 (R)	>=128 (R)	>=128 (R)	>=128 (R)	>=32 (R)	>=64 (R)	>=64 (R)	>=4 (R)	>=64 (R)	>=64 (R)	>=64 (R)	>=64 (R)	>=64 (R)	>=16 (R)	>=16 (R)	>=4 (R)	4 (R)	>=8 (R)	>=8 (R)	<=0.5 (S)	16 (R)	>=16 (R)	>=320 (R)
KB-2016-120	1707120	2016	K-B (O)	UR	ST101	OXA-48	K17	137	C28S	-	16 (R)	>32 (R)	3 (I)	8 (I)	>=32 (R)	>=32 (R)	>=128 (R)	>=128 (R)	>=128 (R)	>=128 (R)	>=32 (R)	>=64 (R)	>=64 (R)	>=4 (R)	>=64 (R)	>=64 (R)	>=64 (R)	>=64 (R)	32 (R)	>=16 (R)	>=16 (R)	>=4 (R)	>=8 (R)	>=8 (R)	>=8 (R)	2 (R)	8 (S)	>=16 (R)	40 (S)
KB-2015-121	1707121	2015	K-B (O)	UR	ST101	-	K17	137	C28S	-	16 (R)	3 (R)	0.38 (S)	1 (S)	>=32 (R)	>=32 (R)	>=128 (R)	>=128 (R)	>=128 (R)	>=128 (R)	16 (R)	>=64 (R)	>=64 (R)	>=4 (R)	>=64 (R)	>=64 (R)	>=64 (R)	>=64 (R)	16 (I)	<=1 (S)	>=16 (R)	>=4 (R)	>=8 (R)	>=8 (R)	>=8 (R)	2 (R)	16 (R)	>=16 (R)	40 (S)
KB-2015-122	1707122	2015	K-B (O)	UR	ST101	OXA-48	K17	137	C28S	-	16 (R)	>32 (R)	3 (I)	8 (I)	>=32 (R)	>=32 (R)	>=128 (R)	>=128 (R)	>=128 (R)	>=128 (R)	>=32 (R)	>=64 (R)	>=64 (R)	>=4 (R)	>=64 (R)	>=64 (R)	>=64 (R)	>=64 (R)	16 (I)	>=16 (R)	>=16 (R)	>=4 (R)	>=8 (R)	>=8 (R)	>=8 (R)	2 (R)	16 (R)	>=16 (R)	40 (S)
KB-2016-123	1707123	2016	K-B (O)	BA	ST101	OXA-48	K17	137	C28S	-	16 (R)	>32 (R)	4 (I)	8 (I)	>=32 (R)	>=32 (R)	>=128 (R)	>=128 (R)	>=128 (R)	>=128 (R)	>=32 (R)	>=64 (R)	>=64 (R)	>=4 (R)	>=64 (R)	>=64 (R)	>=64 (R)	>=64 (R)	16 (I)	>=16 (R)	>=16 (R)	>=4 (R)	>=8 (R)	>=8 (R)	>=8 (R)	2 (R)	4 (S)	>=16 (R)	40 (S)
KB-2016-124	1707124	2016	K-B (O)	UR	ST101	OXA-48	K17	137	C28S	-	16 (R)	24 (R)	3 (I)	6 (I)	>=32 (R)	>=32 (R)	>=128 (R)	>=128 (R)	>=128 (R)	>=128 (R)	>=32 (R)	>=64 (R)	>=64 (R)	>=4 (R)	>=64 (R)	>=64 (R)	>=64 (R)	>=64 (R)	8 (S)	>=16 (R)	>=16 (R)	>=4 (R)	>=8 (R)	>=8 (R)	>=8 (R)	2 (R)	8 (S)	>=16 (R)	40 (S)
KB-2016-125	1707125	2016	K-B (O)	UR	ST101	OXA-48	K17	137	C28S	-	16 (R)	>32 (R)	3 (I)	6 (I)	>=32 (R)	>=32 (R)	>=128 (R)	>=128 (R)	>=128 (R)	>=128 (R)	>=32 (R)	>=64 (R)	>=64 (R)	>=4 (R)	>=64 (R)	>=64 (R)	>=64 (R)	>=64 (R)	16 (I)	>=16 (R)	>=16 (R)	>=4 (R)	>=8 (R)	>=8 (R)	>=8 (R)	2 (R)	16 (R)	>=16 (R)	40 (S)
KB-2016-126	1707126	2016	K-B (O)	UR	ST101	OXA-48	K17	137	C28S	-	16 (R)	>32 (R)	3 (I)	6 (I)	>=32 (R)	>=32 (R)	>=128 (R)	>=128 (R)	>=128 (R)	>=128 (R)	>=32 (R)	>=64 (R)	>=64 (R)	>=4 (R)	>=64 (R)	>=64 (R)	>=64 (R)	>=64 (R)	16 (I)	>=16 (R)	>=16 (R)	>=4 (R)	>=8 (R)	>=8 (R)	>=8 (R)	2 (R)	16 (R)	>=16 (R)	80 (I)
KB-2016-127	1707127	2016	K-B (O)	UR	ST101	OXA-48	K17	137	C28S	-	16 (R)	>32 (R)	4 (I)	8 (I)	>=32 (R)	>=32 (R)	>=128 (R)	>=128 (R)	>=128 (R)	>=128 (R)	>=32 (R)	>=64 (R)	>=64 (R)	>=4 (R)	>=64 (R)	>=64 (R)	>=64 (R)	>=64 (R)	16 (I)	>=16 (R)	>=16 (R)	>=4 (R)	>=8 (R)	>=8 (R)	>=8 (R)	2 (R)	16 (R)	>=16 (R)	40 (S)
KB-2016-128	1707128	2016	K-B (O)	BS	ST101	OXA-48	K17	137(W39L)	C28S	-	16 (R)	>32 (R)	4 (I)	8 (I)	>=32 (R)	>=32 (R)	>=128 (R)	>=128 (R)	>=128 (R)	>=128 (R)	>=32 (R)	>=64 (R)	>=64 (R)	>=4 (R)	>=64 (R)	>=64 (R)	>=64 (R)	>=64 (R)	16 (I)	>=16 (R)	>=16 (R)	>=4 (R)	>=8 (R)	>=8 (R)	>=8 (R)	>=8 (R)	>=64 (R)	>=16 (R)	>=320 (R)
KB-2016-129	1707129	2016	K-B (O)	UR	ST101	OXA-48	K17	137	C28S	-	16 (R)	24 (R)	3 (I)	4 (I)	>=32 (R)	>=32 (R)	>=128 (R)	>=128 (R)	>=128 (R)	>=128 (R)	>=32 (R)	>=64 (R)	>=64 (R)	>=4 (R)	>=64 (R)	>=64 (R)	>=64 (R)	>=64 (R)	8 (S)	>=16 (R)	>=16 (R)	>=4 (R)	>=8 (R)	>=8 (R)	>=8 (R)	2 (R)	8 (S)	>=16 (R)	40 (S)
KB-2016-130	1707130	2016	K-B (O)	UR	ST101	OXA-48	K17	137	C28S	-	16 (R)	>32 (R)	1.5 (S)	6 (I)	>=32 (R)	>=32 (R)	>=128 (R)	>=128 (R)	>=128 (R)	>=128 (R)	>=32 (R)	>=64 (R)	>=64 (R)	>=4 (R)	>=64 (R)	>=64 (R)	>=64 (R)	>=64 (R)	8 (S)	>=16 (R)	>=16 (R)	>=4 (R)	>=8 (R)	>=8 (R)	>=8 (R)	>=8 (R)	>=64 (R)	>=16 (R)	160 (R)
CCDM-2016-131	1707131	2016	CCDM-B (H)	BS	ST101	OXA-48	K17	137	C28S	-	16 (R)	>32 (R)	3 (I)	8 (I)	>=32 (R)	>=32 (R)	>=128 (R)	>=128 (R)	>=128 (R)	>=128 (R)	>=32 (R)	>=64 (R)	>=64 (R)	>=4 (R)	>=64 (R)	>=64 (R)	>=64 (R)	>=64 (R)	16 (I)	>=16 (R)	>=16 (R)	>=4 (R)	>=8 (R)	>=8 (R)	>=8 (R)	2 (R)	8 (S)	>=16 (R)	>=320 (R)
KB-2016-132	1707132	2016	K-B (O)	UR	ST101	-	K17	137	C28S	-	16 (R)	4 (R)	0.38 (S)	1 (S)	>=32 (R)	>=32 (R)	>=128 (R)	>=128 (R)	>=128 (R)	>=128 (R)	16 (R)	>=64 (R)	>=64 (R)	>=4 (R)	>=64 (R)	>=64 (R)	>=64 (R)	>=64 (R)	<=2 (S)	<=1 (S)	<=1 (S)	>=4 (R)	>=8 (R)	>=8 (R)	>=8 (R)	2 (R)	16 (R)	>=16 (R)	40 (S)
KB-2016-133	1707133	2016	K-B (O)	UR	ST101	OXA-48	K17	137(W39L)	C28S	-	16 (R)	32 (R)	2 (S)	6 (I)	>=32 (R)	>=32 (R)	>=128 (R)	>=128 (R)	>=128 (R)	>=128 (R)	>=32 (R)	>=64 (R)	>=64 (R)	>=4 (R)	>=64 (R)	>=64 (R)	>=64 (R)	>=64 (R)	16 (I)	>=16 (R)	>=16 (R)	>=4 (R)	>=8 (R)	>=8 (R)	>=8 (R)	2 (R)	16 (R)	>=16 (R)	40 (S)
KB-2017-134	1707134	2017	K-B (O)	UR	ST101	OXA-48	K17	137	C28S	-	8 (R)	24 (R)	2 (S)	6 (I)	>=32 (R)	>=32 (R)	>=128 (R)	>=128 (R)	>=128 (R)	>=128 (R)	>=32 (R)	>=64 (R)	>=64 (R)	>=4 (R)	>=64 (R)	>=64 (R)	>=64 (R)	>=64 (R)	16 (I)	>=16 (R)	>=16 (R)	>=4 (R)	>=8 (R)	>=8 (R)	>=8 (R)	2 (R)	16 (R)	>=16 (R)	<=20 (S)
CCDM-2017-135	1707135	2017	CCDM-B (H)	BS	ST258	KPC-2	K106	29	IS5-like element at nt 75 (RW)	PhoQ (V446G)	8 (R)	>32 (R)	12 (R)	>32 (R)	>=32 (R)	>=32 (R)	>=128 (R)	>=128 (R)	>=128 (R)	>=128 (R)	>=32 (R)	>=64 (R)	>=64 (R)	>=4 (R)	>=64 (R)	>=64 (R)	>=64 (R)	>=64 (R)	>=64 (R)	4 (I)	>=16 (R)	>=4 (R)	>=8 (R)	>=8 (R)	>=8 (R)	<=0.5 (S)	>=64 (R)	>=16 (R)	>=320 (R)
KB-2017-136	1707136	2017	K-B (O)	UR	ST101	OXA-48	K17	137	C28S	-	8 (R)	>32 (R)	2 (S)	6 (I)	>=32 (R)	>=32 (R)	>=128 (R)	>=128 (R)	>=128 (R)	>=128 (R)	>=32 (R)	>=64 (R)	>=64 (R)	>=4 (R)	>=64 (R)	>=64 (R)	>=64 (R)	>=64 (R)	4 (S)	>=16 (R)	>=16 (R)	>=4 (R)	>=8 (R)	>=8 (R)	>=8 (R)	2 (R)	>=64 (R)	>=16 (R)	160 (R)
CCDM-2017-137	1707137	2017	CCDM-B (H)	BS	ST101	OXA-48	K17	137(W39L)	C28S	-	16 (R)	4 (R)	2 (S)	8 (I)	>=32 (R)	>=32 (R)	>=128 (R)	>=128 (R)	>=128 (R)	>=128 (R)	>=32 (R)	>=64 (R)	>=64 (R)	>=4 (R)	>=64 (R)	>=64 (R)	>=64 (R)	>=64 (R)	8 (S)	>=16 (R)	>=16 (R)	>=4 (R)	>=8 (R)	>=8 (R)	>=8 (R)	2 (R)	16 (R)	>=16 (R)	40 (S)
CCDM-2017-138	1707138	2017	CCDM-B (H)	UR	ST101	OXA-48	K17	137(W39L)	C28S	-	16 (R)	32 (R)	2 (S)	6 (I)	>=32 (R)	>=32 (R)	>=128 (R)	>=128 (R)	>=128 (R)	>=128 (R)	>=32 (R)	>=64 (R)	>=64 (R)	>=4 (R)	>=64 (R)	>=64 (R)	>=64 (R)	>=64 (R)	8 (S)	<=1 (S)	>=16 (R)	>=4 (R)	>=8 (R)	>=8 (R)	>=8 (R)	2 (R)	16 (R)	>=16 (R)	40 (S)
KB-2017-139	1707139	2017	K-B (O)	UR	ST101	OXA-48	K17	137	C28S	-	16 (R)	24 (R)	3 (I)	12 (I)	>=32 (R)	>=32 (R)	>=128 (R)	>=128 (R)	>=128 (R)	>=128 (R)	>=32 (R)	>=64 (R)	>=64 (R)	>=4 (R)	>=64 (R)	>=64 (R)	>=64 (R)	>=64 (R)	8 (S)	>=16 (R)	>=16 (R)	>=4 (R)	>=8 (R)	>=8 (R)	>=8 (R)	2 (R)	8 (S)	>=16 (R)	40 (S)
CCDM-2017-140	1707140	2017	CCDM-B (H)	BS	ST101	-	K17	137	C28S	-	16 (R)	>32 (R)	0.38 (S)	1 (S)	>=32 (R)	>=32 (R)	>=128 (R)	>=128 (R)	>=128 (R)	>=128 (R)	16 (R)	>=64 (R)	>=64 (R)	>=4 (R)	>=64 (R)	>=64 (R)	>=64 (R)	>=64 (R)	16 (I)	>=16 (R)	>=16 (R)	>=4 (R)	>=8 (R)	>=8 (R)	>=8 (R)	2 (R)	16 (R)	>=16 (R)	40 (S)
KV-2017-142	1707142	2017	KV (H)	BS	ST101	OXA-48	K17	137	C28S	-	8 (R)	>32 (R)	2 (S)	6 (I)	>=32 (R)	>=32 (R)	>=128 (R)	>=128 (R)	>=128 (R)	>=128 (R)	>=32 (R)	>=64 (R)	>=64 (R)	>=4 (R)	>=64 (R)	>=64 (R)	>=64 (R)	>=64 (R)	16 (I)	>=16 (R)	>=16 (R)	>=4 (R)	>=8 (R)	>=8 (R)	>=8 (R)	2 (R)	8 (S)	>=16 (R)	<=20 (S)
KV-2017-143	1707143	2017	KV (H)	WS	ST101	OXA-48	K17	137	K2*	-	8 (R)	>32 (R)	3 (I)	8 (I)	>=32 (R)	>=32 (R)	>=128 (R)	>=128 (R)	>=128 (R)	>=128 (R)	>=32 (R)	>=64 (R)	>=64 (R)	>=4 (R)	>=64 (R)	>=64 (R)	>=64 (R)	>=64 (R)	<=2 (S)	<=1 (S)	<=1 (S)	>=4 (R)	>=8 (R)	>=8 (R)	>=8 (R)	4 (R)	>=64 (R)	>=16 (R)	>=320 (R)
SU-2017-144	1707144	2017	SU (H)	BS	ST101	OXA-48	K17	137	C28S	-	8 (R)	>32 (R)	2 (S)	6 (I)	>=32 (R)	>=32 (R)	>=128 (R)	>=128 (R)	>=128 (R)	>=128 (R)	>=32 (R)	>=64 (R)	>=64 (R)	>=4 (R)	>=64 (R)	>=64 (R)	>=64 (R)	>=64 (R)	16 (I)	>=16 (R)	>=16 (R)	>=4 (R)	>=8 (R)	>=8 (R)	>=8 (R)	2 (R)	16 (R)	>=16 (R)	40 (S)
GZB-2017-145	1707145	2017	GZ-B (O)	UR	ST437	OXA-48	K36	109	K3*	-	32 (R)	>32 (R)	6 (I)	12 (I)	>=32 (R)	>=32 (R)	>=128 (R)	>=128 (R)	>=128 (R)	>=128 (R)	>=32 (R)	>=64 (R)	>=64 (R)	>=4 (R)	>=64 (R)	>=64 (R)	>=64 (R)	>=64 (R)	>=64 (R)	>=16 (R)	>=16 (R)	>=4 (R)	>=8 (R)	>=8 (R)	>=8 (R)	1 (R)	16 (R)	>=16 (R)	>=320 (R)

## Sheet: S2
Table S2. Sample information about the ST101 isolates retrieved from the INSDC databases.
assembly	biosample	strain	location	date	year	host_health_state	source
GCF_000567625	SAMN02138589	BWH 2	missing	missing			Tissue
GCF_001316495	SAMN04011419	ST101:950171785	South Africa: Durban	missing			missing
GCF_001316565	SAMN04011426	ST101:960186733	South Africa: Durban	missing			missing
GCF_001316645	SAMN04011433	ST101:951373950	South Africa: Durban	03-Jul-2013	2013		blood
GCF_001316695	SAMN04011436	ST101:945165838	South Africa: Durban	25-Jun-2013	2013		pus swab from leg
GCF_001316745	SAMN04011438	ST101:945169659	South Africa: Durban	19-Jul-2013	2013		urine
GCF_001316785	SAMN04011420	ST101:950173000	South Africa: Durban	missing			missing
GCF_001316895	SAMN04011434	ST2016:951362657	South Africa: Durban	missing			missing
GCF_001316955	SAMN04011442	ST101:957083896	South Africa: Durban	03-Aug-2013	2013		urine
GCF_001316985	SAMN04011443	ST101:951384356	South Africa: Durban	26-Aug-2013	2013		TIP
GCF_001317005	SAMN04011444	ST101:957089165	South Africa: Durban	missing			pus swab (trachea)
GCF_001317015	SAMN04011445	ST101:957083320	South Africa: Durban	21-Jul-2013	2013		urine
GCF_001317035	SAMN04011447	ST101:U44822 (26/7/13)	South Africa: Durban	missing			missing
GCF_001317165	SAMN04011454	ST101:939996824	South Africa: Durban	41303			pus
GCF_001317295	SAMN04011455	ST101:951363981	South Africa: Durban	04-Apr-2013	2013		urine
GCF_001317375	SAMN04011446	ST101:945154233	South Africa: Durban	missing			sputum
GCF_001463615	SAMN04158315	50752501	Norway	2013	2013		Abdominal drain tube
GCF_001720745	SAMN05213503	CFSAN044573	Pakistan	2013	2013		other body fluid
GCF_001720815	SAMN05213502	CFSAN044572	Pakistan	2013	2013		blood
GCF_001902435	SAMN05412455	Kp_Goe_33208	Germany: Goettingen	41369	2013		wound swab
GCF_001902515	SAMN05412456	Kp_Goe_71070	Germany: Goettingen	41369	2013		urine sample
GCF_001913175	SAMN05412452	Kp_Goe_121641	Germany: Goettingen	41345	2013		urine sample
GCF_002093155	SAMN05892170	Kleb_Syr	Syria	2016	2016		missing
GCF_002187295	SAMN05960927	G3504	Nigeria	41955			Blood
GCF_002187855	SAMN05960885	PO1407	Nigeria	01-Apr-2010	2010		Blood
GCF_002189245	SAMN06208981	C10-E6-15	Tunisia: Sousse	2015	2015		Urine
GCF_002189255	SAMN06209081		Tunisia: Sousse	2015	2015		Urine
GCF_002189265	SAMN06208379	C6-E2-14	Tunisia: Sousse	2014	2014		Urine
GCF_002189305	SAMN06209419	C12-E8-15	Tunisia: Sousse	2015	2015		Urine
GCF_002189335	SAMN06208380	C7-E3-14	Tunisia: Sousse	2014	2014		Urine
GCF_002235835	SAMN06917620	27	Italy	41282			urine
GCF_002246235	SAMN07450565	KPCRETH20	Thailand: Bangkok	42381	2016	sick	Rectal swab
GCF_002246245	SAMN07450567	KPCRETH18	Thailand: Bangkok	42347	2015	sick	Rectal swab
GCF_002246635	SAMN07450566	KPCRETH19	Thailand: Bangkok	42374	2016	sick	Rectal swab
GCF_002247645	SAMN07450639	KPSW+02	Thailand: Lamphun	42071	2015	NA	Rectal swab
GCF_002248525	SAMN07450699	KPPUTH07	Thailand: Bangkok	42529	2016	sick	urine
GCF_002411715	SAMN07692772	183	Ghana: Kumasi	2015	2015		urine
GCF_002417245	SAMN06106883		South Africa:Pretoria	26-May-2013	2013		urine
GCF_002851345	SAMN06629620	COL-Kpn43		2006	2006		missing
GCF_002854355	SAMN06629657	COL-Kpn80	Colombia: Pereira	2010	2010		missing
GCF_002854695	SAMN06629628	COL-Kpn51	Colombia: Bucaramanga	2007	2007		missing
GCF_002854715	SAMN06629632	COL-Kpn55	Colombia: Cali	2007	2007		missing
GCF_002854955	SAMN06629674	COL-Kpn97	Colombia: Ibague	2007	2007		missing
GCF_002855315	SAMN06629633	COL-Kpn56	Colombia: Barranquilla	2007	2007		missing
GCF_003034395	SAMN08049050	K9	Greece:Piraeus	42078	2015		blood
GCF_003034425	SAMN08049054	K19	Greece:Piraeus	42578	2016		blood
GCF_003034445	SAMN08049049	K5		42038	2015		blood
GCF_003034505	SAMN08049053	K18	Greece:Piraeus	42475	2016		blood
GCF_003034525	SAMN08049052	K13	Greece:Piraeus	42261	2015		blood
GCF_003034545	SAMN08049051	K10	Greece:Piraeus	42197	2015		blood
GCF_003184005	SAMN09223223	GML-KP5-Col_R-TR	Turkey:Kayseri	2017	2017		endotracheal aspirate
GCF_003226215	SAMN09104660	Kp938	Spain:Barcelona	06-Apr-2013	2013		blood
GCF_003226975	SAMN08399027	DG7721	Italy: Florence	42644			Rectal swab
GCF_003227515	SAMN08399022	DG5559	Italy: Florence	Feb-2016	2016		Rectal swab
GCF_003227655	SAMN08399021	DG5546	Italy: Florence	42370			Rectal swab
GCF_003382185	SAMN09768099	206	Ghana: Kumasi	2015	2015		urine
GCF_003571545	SAMN04014976		missing	missing			missing
GCF_003591535	SAMN07572627	SC633656	Germany	June-2016	2016		rectal swab
GCF_003592035	SAMN07572625	KL615329	Germany	Aug-2016	2016		rectal swab
GCF_003664815	SAMN10036121	SU3	China: Shandong, Zhucheng	19-Jul-2015	2015		river water
GCF_900084345	SAMEA2273643	k1061	United Kingdom	2005	2005	diseased	blood
GCF_900084605	SAMEA2273748	k1798	United Kingdom	2008	2008	diseased	blood
GCF_900084825	SAMEA2273563	k518	United Kingdom	2003	2003	diseased	blood
GCF_900084885	SAMEA2273569	k548	United Kingdom	2003	2003		blood
GCF_900085505	SAMEA2273805	k2311	United Kingdom	2010	2010	diseased	blood
GCF_900085925	SAMEA2273874	k1631	United Kingdom	2007	2007	diseased	blood
GCF_900086245	SAMEA2273680	k1322	United Kingdom	2006	2006	diseased	blood
GCF_900086355	SAMEA2273722	k1640	United Kingdom	2007	2007	diseased	blood
GCF_900086465	SAMEA2273763	k1953	United Kingdom	2008	2008	diseased	blood
GCF_900086505	SAMEA2273782	k1070	United Kingdom	2005	2005	diseased	blood
GCF_900092695	SAMEA3531842	PB425	Thailand	2015	2015	diseased	blood
GCF_900093165	SAMEA3531831	PB295	Thailand	2015	2015	diseased	pus
GCF_900493175	SAMEA2401541		Austria, Schiltern	27-Jun-2012	2012
GCF_900494445	SAMEA2400566			missing
GCF_900500885	SAMEA3649690	EuSCAPE_GR071	Greece	2014	2014	Infection	urine
GCF_900501645	SAMEA3649819	EuSCAPE_RS010	Serbia	2013	2013	Infection	urine
GCF_900502305	SAMEA3649744	EuSCAPE_GR125	Greece	2014	2014	Infection	Wound Secretion
GCF_900502435	SAMEA3649780	EuSCAPE_GR162	Greece	2014	2014		Other (bile)
GCF_900502495	SAMEA3649810	EuSCAPE_RS006	Serbia	2013	2013	Infection	Wound Secretion
GCF_900502975	SAMEA3673018	EuSCAPE_SI001	Slovenia	2013	2013	Infection	urine
GCF_900502985	SAMEA3673019	EuSCAPE_SI002	Slovenia	2013	2013	Infection	urine
GCF_900503095	SAMEA3673042	EuSCAPE_SI025	Slovenia	2013	2013		Lower Respiratory Tract Secrection
GCF_900503305	SAMEA3721021	EuSCAPE_RO103	Romania	2013	2013	Infection	urine
GCF_900503315	SAMEA3721025		Romania	2013	2013	Infection	urine
GCF_900503345	SAMEA3721041	EuSCAPE_RO113	Romania	2013	2013	Infection	urine
GCF_900503395	SAMEA3721146	EuSCAPE_RS025	Serbia	2014	2014	Infection	urine
GCF_900503405	SAMEA3721141	EuSCAPE_RS018	Serbia	2014	2014	Infection	blood
GCF_900503425	SAMEA3721154	EuSCAPE_RS033	Serbia	2014	2014	Infection	urine
GCF_900503445	SAMEA3721165	EuSCAPE_RS044	Serbia	2014	2014	Infection	blood
GCF_900503455	SAMEA3721156	EuSCAPE_RS035	Serbia	2014	2014	Infection	Wound Secretion
GCF_900503475	SAMEA3721159	EuSCAPE_RS038	Serbia	2013	2013	Infection	blood
GCF_900503505	SAMEA3721175	EuSCAPE_RS054	Serbia	2014	2014	Infection	urine
GCF_900503515	SAMEA3721180	EuSCAPE_RS060	Serbia	2013	2013	Infection	urine
GCF_900503535	SAMEA3721191	EuSCAPE_RS071	Serbia	2014	2014	Infection	blood
GCF_900503545	SAMEA3721187	EuSCAPE_RS067	Serbia	2013	2013	Infection	blood
GCF_900503565	SAMEA3721196	EuSCAPE_RS076	Serbia	2013	2013	Infection	blood
GCF_900503625	SAMEA3721217	EuSCAPE_RS099	Serbia	2014	2014	Infection	blood
GCF_900504065	SAMEA3673111	EuSCAPE_RO010	Romania	2013	2013	Infection	Lower Respiratory Tract Secrection
GCF_900504095	SAMEA3720965	EuSCAPE_RO056	Romania	2014	2014		urine
GCF_900504105	SAMEA3720970	EuSCAPE_RO061	Romania	2014	2014		blood
GCF_900504115	SAMEA3720966	EuSCAPE_RO057	Romania	2014	2014	Infection	Lower Respiratory Tract Secrection
GCF_900504165	SAMEA3673113	EuSCAPE_RO012	Romania	2014	2014		urine
GCF_900504175	SAMEA3720976	EuSCAPE_RO067	Romania	2013	2013	Infection	urine
GCF_900504325	SAMEA3720991	EuSCAPE_RO082	Romania	missing		Infection	urine
GCF_900504335	SAMEA3720992	EuSCAPE_RO083	Romania	2014	2014	Infection	urine
GCF_900504345	SAMEA3673115	EuSCAPE_RO014	Romania	2013	2013	Infection	blood
GCF_900504375	SAMEA3720993	EuSCAPE_RO084	Romania	2014	2014	Infection	urine
GCF_900504385	SAMEA3720997	EuSCAPE_RO088	Romania	2014	2014	Infection	urine
GCF_900504415	SAMEA3720998	EuSCAPE_RO089	Romania	2014	2014	Infection	Lower Respiratory Tract Secrection
GCF_900504445	SAMEA3673116	EuSCAPE_RO015	Romania	2014	2014	Infection	Lower Respiratory Tract Secrection
GCF_900504465	SAMEA3721007	EuSCAPE_RO095	Romania	2014	2014	Infection	urine
GCF_900504495	SAMEA3721016	EuSCAPE_RO101	Romania	2013	2013	Infection	Lower Respiratory Tract Secrection
GCF_900504505	SAMEA3721014	EuSCAPE_RO099	Romania	2013	2013	Infection	urine
GCF_900504555	SAMEA3673124	EuSCAPE_RO023	Romania	2014	2014		urine
GCF_900504575	SAMEA3673127	EuSCAPE_RO026	Romania	2013	2013	Infection	blood
GCF_900504665	SAMEA3673130	EuSCAPE_RO029	Romania	2014	2014		urine
GCF_900504765	SAMEA3673105	EuSCAPE_RO004	Romania	2014	2014		Wound Secretion
GCF_900504885	SAMEA3721045	EuSCAPE_RO115	Romania	2013	2013	Infection	Lower Respiratory Tract Secrection
GCF_900505065	SAMEA3721138	EuSCAPE_RS015	Serbia	2014	2014	Infection	urine
GCF_900505075	SAMEA3721047	EuSCAPE_RO117	Romania	2013	2013	Infection	urine
GCF_900505085	SAMEA3721136	EuSCAPE_RS012	Serbia	2014	2014	Infection	urine
GCF_900505095	SAMEA3721139	EuSCAPE_RS016	Serbia	2014	2014	Infection	urine
GCF_900505125	SAMEA3721147	EuSCAPE_RS026	Serbia	2014	2014	Infection	Wound Secretion
GCF_900505135	SAMEA3721140	EuSCAPE_RS017	Serbia	2014	2014	Infection	urine
GCF_900505145	SAMEA3721148	EuSCAPE_RS027	Serbia	2013	2013	Infection	blood
GCF_900505175	SAMEA3721049	EuSCAPE_RO118	Romania	2013	2013	Infection	Lower Respiratory Tract Secrection
GCF_900505185	SAMEA3721155	EuSCAPE_RS034	Serbia	2014	2014	Infection	urine
GCF_900505195	SAMEA3721149	EuSCAPE_RS028	Serbia	2013	2013	Infection	blood
GCF_900505245	SAMEA3721168	EuSCAPE_RS047	Serbia	2013	2013	Infection	urine
GCF_900505255	SAMEA3721163	EuSCAPE_RS042	Serbia	2014	2014	Infection	Wound Secretion
GCF_900505275	SAMEA3721164	EuSCAPE_RS043	Serbia	2013	2013	Infection	blood
GCF_900505305	SAMEA3721051	EuSCAPE_RO119	Romania	2013	2013	Infection	blood
GCF_900505315	SAMEA3721173	EuSCAPE_RS052	Serbia	missing			Lower Respiratory Tract Secrection
GCF_900505335	SAMEA3721179	EuSCAPE_RS058	Serbia	2014	2014	Infection	urine
GCF_900505375	SAMEA3721183	EuSCAPE_RS063	Serbia	2013	2013	Infection	urine
GCF_900505395	SAMEA3721188	EuSCAPE_RS068	Serbia	2014	2014	Infection	blood
GCF_900505415	SAMEA3721189	EuSCAPE_RS069	Serbia	2013	2013	Infection	Wound Secretion
GCF_900505435	SAMEA3721194	EuSCAPE_RS074	Serbia	2014	2014	Infection	Wound Secretion
GCF_900505445	SAMEA3721199	EuSCAPE_RS079	Serbia	2014	2014	Infection	urine
GCF_900505475	SAMEA3721058	EuSCAPE_RO122	Romania	2013	2013	Infection	blood
GCF_900505485	SAMEA3721206	EuSCAPE_RS086	Serbia	2014	2014	Colonization	Lower Respiratory Tract Secrection
GCF_900505505	SAMEA3721205	EuSCAPE_RS085	Serbia	2014	2014	Infection	urine
GCF_900505525	SAMEA3721208	EuSCAPE_RS088	Serbia	2014	2014	Colonization	Lower Respiratory Tract Secrection
GCF_900505535	SAMEA3721210	EuSCAPE_RS092	Serbia	2014	2014	Colonization	Lower Respiratory Tract Secrection
GCF_900505555	SAMEA3721218	EuSCAPE_RS100	Serbia	2014	2014	Infection	blood
GCF_900505575	SAMEA3721060	EuSCAPE_RO123	Romania	2013	2013	Infection	blood
GCF_900505595	SAMEA3721221	EuSCAPE_RS103	Serbia	2014	2014	Infection	Wound Secretion
GCF_900505605	SAMEA3721062	EuSCAPE_RO124	Romania	2013	2013	Infection	urine
GCF_900505625	SAMEA3721064	EuSCAPE_RO125	Romania	2013	2013	Infection	urine
GCF_900505645	SAMEA3721066	EuSCAPE_RO126	Romania	2013	2013	Infection	Lower Respiratory Tract Secrection
GCF_900505805	SAMEA3721030	EuSCAPE_RO107	Romania	2013	2013	Infection	Lower Respiratory Tract Secrection
GCF_900506035	SAMEA3721089	EuSCAPE_HR057	Croatia	2014	2014	Infection	urine
GCF_900506145	SAMEA3721036	EuSCAPE_RO111	Romania	2013	2013	Infection	Wound Secretion
GCF_900506705	SAMEA3727640	EuSCAPE_BE050	Belgium	2014	2014	Colonization	Lower Respiratory Tract Secrection
GCF_900506715	SAMEA3727637	EuSCAPE_BE047	Belgium	2014	2014	Infection	Puncture Fluids
GCF_900506735	SAMEA3727643	EuSCAPE_BE053	Belgium	2014	2014	Infection	Puncture Fluids
GCF_900506775	SAMEA3727653	EuSCAPE_BE064	Belgium	2013	2013		Lower Respiratory Tract Secrection
GCF_900506845	SAMEA3727656	EuSCAPE_BE067	Belgium	2013	2013	Infection	Puncture Fluids
GCF_900506885	SAMEA3727666	EuSCAPE_BE079	Belgium	2014	2014		Lower Respiratory Tract Secrection
GCF_900506935	SAMEA3727670	EuSCAPE_BE083	Belgium	2014	2014		Lower Respiratory Tract Secrection
GCF_900506945	SAMEA3727669	EuSCAPE_BE082	Belgium	2014	2014		Lower Respiratory Tract Secrection
GCF_900507115	SAMEA3727535	EuSCAPE_RS108	Serbia	2014	2014	Infection	urine
GCF_900507165	SAMEA3727542	EuSCAPE_RS115	Serbia	2014	2014	Infection	urine
GCF_900507195	SAMEA3727545	EuSCAPE_RS118	Serbia	2014	2014	Infection	urine
GCF_900507575	SAMEA3727722	EuSCAPE_TR001	Turkey	2014	2014	Infection	Lower Respiratory Tract Secrection
GCF_900507645	SAMEA3727725	EuSCAPE_TR004	Turkey	2014	2014	Infection	blood
GCF_900507855	SAMEA3729710	EuSCAPE_TR044	Turkey	2013	2013	Infection	blood
GCF_900507925	SAMEA3729731	EuSCAPE_TR055	Turkey	2013	2013		blood
GCF_900507935	SAMEA3729724	EuSCAPE_TR052	Turkey	2013	2013	Infection	blood
GCF_900507945	SAMEA3729735	EuSCAPE_TR057	Turkey	2014	2014	Infection	urine
GCF_900508145	SAMEA3729877	EuSCAPE_TR280	Turkey	2014	2014	Infection	urine
GCF_900508185	SAMEA3729886	EuSCAPE_TR290	Turkey	2013	2013	Infection	Lower Respiratory Tract Secrection
GCF_900508245	SAMEA3729898	EuSCAPE_TR304	Turkey	2013	2013	Infection	urine
GCF_900508585	SAMEA3729752	EuSCAPE_TR186	Turkey	2014	2014	Infection	Lower Respiratory Tract Secrection
GCF_900508775	SAMEA3729788	EuSCAPE_TR207	Turkey	2014	2014		blood
GCF_900508875	SAMEA3729815	EuSCAPE_TR224	Turkey	2014	2014	Infection	blood
GCF_900508885	SAMEA3729826	EuSCAPE_TR230	Turkey	2013	2013	Infection	blood
GCF_900509145	SAMEA3729870	EuSCAPE_TR273	Turkey	2014	2014	Infection	urine
GCF_900509165	SAMEA3729873	EuSCAPE_TR276	Turkey	2013	2013	Infection	Lower Respiratory Tract Secrection
GCF_900509195	SAMEA3729874	EuSCAPE_TR277	Turkey	2013	2013	Infection	Lower Respiratory Tract Secrection
GCF_900511405	SAMEA3499903	EuSCAPE_AT031	Austria	2013	2013	Infection	Wound Secretion
GCF_900511545	SAMEA3499969	EuSCAPE_FR001	France	2013	2013	Infection	urine
GCF_900511565	SAMEA3499973	EuSCAPE_FR003	France	2014	2014	Infection	Other (catheter)
GCF_900512775	SAMEA3512037	EuSCAPE_DE010	Germany	2014	2014		Lower Respiratory Tract Secrection
GCF_900512795	SAMEA3512122	EuSCAPE_NO002	Norway	2013	2013	Infection	Other (pancreas secretion)
GCF_900513015	SAMEA3515074	EuSCAPE_IT042	Italy	2013	2013	Infection	blood
GCF_900513805	SAMEA3538541	EuSCAPE_IL084	Israel	2014	2014		urine
GCF_900513915	SAMEA3538554	EuSCAPE_ME012	Montenegro	2014	2014	Colonization	Other (tube)
GCF_900514115	SAMEA3538575	EuSCAPE_IT014	Italy	2013	2013	Infection	Lower Respiratory Tract Secrection
GCF_900514255	SAMEA3515229	EuSCAPE_IT201	Italy	2013	2013	Infection	blood
GCF_900514345	SAMEA3515236	EuSCAPE_IT208	Italy	2014	2014	Infection	blood
GCF_900514355	SAMEA3515238	EuSCAPE_IT210	Italy	2014	2014	Infection	blood
GCF_900515415	SAMEA3538627	EuSCAPE_IT260	Italy	2013	2013	Infection	urine
GCF_900517675	SAMEA3649626	EuSCAPE_ES283	Spain	2013	2013	Infection	urine
GCF_900517835	SAMEA3649597	EuSCAPE_GR006	Greece	2013	2013	Infection	Lower Respiratory Tract Secrection
